# Supplementary material for: Tuning the reactivity of mononuclear nonheme manganese(iv)-oxo complexes by triflic acid
Source: Royal Society of Chemistry journal article supplement (doi:10.1039/c5sc00535c), 2015-01-01
Supplement: c5sc00535c1.pdf [file c5sc00535c1.pdf]

## Electronic Supplementary Information

### Tuning the Reactivity of Mononuclear Nonheme Manganese(IV)-Oxo Complexes by Triflic Acid

Junying Chen,<sup>a</sup> Heejung Yoon,<sup>b</sup> Yong-Min Lee,<sup>a</sup> Mi Sook Seo,<sup>a</sup> Ritimukta Sarangi,<sup>c</sup>  
Shunichi Fukuzumi\*<sup>a,b</sup> and Wonwoo Nam\*<sup>a</sup>

<sup>a</sup>*Department of Chemistry and Nano Science and Centre for Biomimetic Systems,  
Ewha Womans University, Seoul 120-750, Korea*

<sup>b</sup>*Department of Material and Life Science, Graduate School of Engineering, ALCA,  
Japan Science and Technology Agency (JST), Osaka University, Suita, Osaka 565-  
0871, Japan*

<sup>c</sup>*Stanford Synchrotron Radiation Lightsource, SLAC National Accelerator Laboratory,  
Menlo Park, California 94025, United States*

\*To whom correspondence should be addressed.

E-mail: wwnam@ewha.ac.kr, fukuzumi@chem.eng.osaka-u.ac.jp

## Experimental section

**Materials.** Commercially available chemicals were used without further purification unless otherwise indicated. Solvents were dried according to published procedures and distilled under Ar prior to use.<sup>S1</sup> Trifluoromethanesulphonic acid (HOTf, OTf = CF<sub>3</sub>SO<sub>3</sub><sup>-</sup>) was purchased from Aldrich and used as received. H<sub>2</sub><sup>18</sup>O (95% <sup>18</sup>O-enriched) was purchased from ICON Services Inc. (Summit, NJ, USA). Iodosylbenzene (PhIO), N4Py and Bn-TPEN ligands, and Mn<sup>II</sup>(OTf)<sub>2</sub>·2CH<sub>3</sub>CN were prepared by literature methods.<sup>S2-S5</sup> [(L)Mn<sup>II</sup>(CF<sub>3</sub>SO<sub>3</sub>)<sup>+</sup>] and [(L)Mn<sup>IV</sup>(O)]<sup>2+</sup> were prepared by literature methods.<sup>S6-S8</sup> One-electron reductants, such as [Fe<sup>II</sup>(Me<sub>2</sub>-bpy)<sub>3</sub>]<sup>2+</sup>, [Fe<sup>II</sup>(phen)<sub>3</sub>]<sup>2+</sup>, [Fe<sup>II</sup>(bpy)<sub>3</sub>]<sup>2+</sup>, [Ru<sup>II</sup>(Me<sub>2</sub>-bpy)<sub>3</sub>]<sup>2+</sup>, [Ru<sup>II</sup>(bpy)<sub>3</sub>]<sup>2+</sup>, [Ru<sup>II</sup>(5-Cl-phen)<sub>3</sub>]<sup>2+</sup>, [Ru<sup>II</sup>(5-Br-bpy)<sub>3</sub>]<sup>2+</sup> and [Ru<sup>II</sup>(5-NO<sub>2</sub>-phen)<sub>3</sub>]<sup>2+</sup>, were synthesized according to literature methods.<sup>S9</sup>

**Instrumentation.** UV-vis spectra were recorded on a Hewlett Packard 8453 diode array spectrophotometer equipped with a UNISOKU Scientific Instruments Cryostat USP-203A for low-temperature experiments or on a Hi-Tech Scientific (U.K.) SF-61 DX2 cryogenic stopped-flow spectrophotometer equipped with a Xe arc lamp and a KinetaScan diode array rapid scanning unit. The cold-spray ionization time-of-flight mass (CSI-TOF MS) spectral data were collected on a JMS-T100CS (JEOL) mass spectrometer equipped with the CSI source. Typical measurement conditions are as follows: needle voltage: 2.2 kV, orifice 1 current: 50-500 nA, orifice 1 voltage: 0 to 20 V, ring lens voltage: 10 V, ion source temperature: 5°C, spray temperature: -40 °C. X-band EPR spectra were recorded at 5 K using X-band Bruker EMX-plus spectrometer equipped with a dual mode cavity (ER 4116DM). Low temperature was achieved and controlled with an Oxford Instruments ESR900 liquid He quartz cryostat with an Oxford Instruments ITC503 temperature and gas flow controller. The experimental parameters for EPR measurement were as follows: Microwave frequency = 9.646 GHz, microwave power = 1.0 mW, modulation amplitude = 10 G, gain = 1 × 10<sup>3</sup>, modulation frequency = 100 kHz, time constant = 40.96 ms, and conversion time = 81.00 ms. <sup>1</sup>H

NMR spectra were measured with a Bruker model digital AVANCE III 400 FT-NMR spectrometer.

**EXAFS measurements.** The Mn K-edge X-ray absorption spectra of **3**,  $[(\text{N4Py})\text{Mn}^{\text{IV}}(\text{O})]^{2+}-(\text{HOTf})_2$ , were measured at the Stanford Synchrotron Radiation Lightsource (SSRL) on the unfocussed 20-pole 2 T wiggler side-station beam line 7-3 under standard ring conditions of 3 GeV and  $\sim 500$  mA. A Si(220) double crystal monochromator was used for energy selection. A Rh-coated harmonic rejection mirror was used on beam line 7-3 to reject components of higher harmonics. The monochromator was further detuned by 70% to eliminate higher harmonic and to reduce beam damage on samples. The solution samples for  $[(\text{N4Py})\text{Mn}^{\text{IV}}(\text{O})]^{2+}-(\text{HOTf})_2$  ( $\sim 120$   $\mu\text{L}$ ) were transferred into 2 mm delrin XAS cells with 70 m Kapton tape windows under synthesis conditions and were immediately frozen after preparation and stored under liquid  $\text{N}_2$ . During data collection, samples were maintained at a constant temperature of  $\sim 10 - 15$  K using an Oxford Instruments CF 1208 liquid helium cryostat. Data were measured to  $k = 12 \text{ \AA}^{-1}$  (fluorescence mode) using a Canberra Ge 30-element array detector. Internal energy calibration was accomplished by simultaneous measurement of the absorption of a Mn-foil placed between two ionization chambers situated after the sample. The first inflection point of the foil spectrum was fixed at 6539.0 eV. Data presented here are 32-scan average spectra for  $[\text{Mn}^{\text{IV}}(\text{O})]^{2+}-(\text{HOTf})_2$ . Data were processed by fitting a second-order polynomial to the pre-edge region and subtracting this from the entire spectrum as background. A four-region spline of orders 2, 3, 3 and 3 was used to model the smoothly decaying post-edge region. The data were normalized by subtracting the cubic spline and assigning the edge jump to 1.0 at 6555 eV using the Pyspline<sup>S10</sup> program. Data were then renormalized in Kaleidagraph for comparison and quantitation purposes. Theoretical EXAFS signals  $\chi(k)$  were calculated by using FEFF<sup>S11-13</sup> (macintosh version). Starting structural models for  $\text{Mn}^{\text{IV}}(\text{O})-(\text{HOTf})_2$  was generated by modifying the crystal structure<sup>[6]</sup> of  $[\text{Mn}^{\text{II}}(\text{N4Py})(\text{CF}_3\text{SO}_3)]^+$  in Avogadro.<sup>S14</sup> The input structure

was improved based on preliminary EXAFS fit parameters to generate more accurate theoretical EXAFS signals. Data fitting was performed in EXAFSPAK.<sup>S15</sup> The structural parameters varied during the fitting process were the bond distance (R) and the bond variance  $\sigma^2$ , which is related to the Debye-Waller factor resulting from thermal motion, and static disorder of the absorbing and scattering atoms. The non-structural parameter  $E_0$  (the energy at which  $k = 0$ ) was also allowed to vary but was restricted to a common value for every component in a given fit. Coordination numbers were systematically varied in the course of the fit but were fixed within a given fit.

**EXAFS data analysis.** The  $k^3$  weighted Mn K-edge EXAFS data for **3**, along with their non-phase shift corrected Fourier transforms (FT) ( $k = 1 - 12 \text{ \AA}^{-1}$ ), are shown in Figure 3. The EXAFS data for  $[(\text{N4Py})\text{Mn}^{\text{IV}}(\text{O})]^{2+}$  (**1**) have been previously reported,<sup>S6</sup> but were re-measured under the same experimental conditions for direct comparison to proton bound  $\text{Mn}^{\text{IV}}(\text{O})$  complex. FEFF fits to the EXAFS data (Table S1 in SI) were performed to quantitatively understand the differences visually observed in the FT data. It is consistent with a distorted six-coordinate first shell with one short Mn–O (1.74 Å) which is longer than the 1.67 Å observed in  $[(\text{N4Py})\text{Mn}^{\text{IV}}(\text{O})]^{2+}$  (**1**).

**Kinetic measurements.** Kinetic measurements were performed on a UNISOKU RSP-601 stopped-flow spectrometer equipped with a MOS-type highly sensitive photodiode array or a Hewlett Packard 8453 photodiode-array spectrophotometer at 298 K. Rates of electron transfer from one-electron donors to  $[(\text{N4Py})\text{Mn}^{\text{IV}}(\text{O})]^{2+}-(\text{HOTf})_2$  (**3**) and oxidation of *para*-X-thioanisoles (X = Me, H, F and Br) by **3** were monitored by the formation of absorption bands due to the one-electron oxidized species and the decay of absorption band due to **3**. Most kinetic measurements were carried out under pseudo-first-order conditions, where concentrations of substrates were maintained to be more than 10-folds excess of that of **3**. Because electron transfer from  $\text{Ru}(\text{Me}_2\text{-bpy})_3^{2+}$  to **3** was too fast to follow even with stopped-flow equipment under pseudo-first-order conditions, the second-order rate constant was determined under second-order conditions, where the concentrations of

$[\text{Ru}^{\text{II}}(\text{Me}_2\text{-bpy})_3]^{2+}$  and **3** were maintained as the same ( $1.0 \times 10^{-4}$  M).

**Redox titrations.** Electron transfer from  $[\text{Ru}^{\text{II}}(5\text{-NO}_2\text{-phen})_3]^{2+}$  to  $[(\text{L})\text{Mn}^{\text{IV}}(\text{O})]^{2+}-(\text{HOTf})_2$  ( $5 \times 10^{-4}$  M) was examined from the spectral change in various concentrations of  $[\text{Ru}^{\text{II}}(5\text{-NO}_2\text{-phen})_3]^{2+}$  ( $1 \times 10^{-4}$  M –  $1 \times 10^{-3}$  M) at 273 K using a Hewlett Packard 8453 photodiode-array spectrometer. Typically, a deaerated  $\text{CH}_3\text{CN}$  solution of  $[\text{Ru}^{\text{II}}(5\text{-NO}_2\text{-phen})_3]^{2+}$  ( $1 \times 10^{-4}$  M –  $1 \times 10^{-3}$  M) was added to a solution of **3** ( $5 \times 10^{-4}$  M) in  $\text{CF}_3\text{CH}_2\text{OH}-\text{CH}_3\text{CN}$  ( $v/v = 1:1$ ). The concentration of  $[\text{Ru}^{\text{III}}(5\text{-NO}_2\text{-phen})_3]^{3+}$  was determined from the absorption band at  $\lambda_{\text{max}} = 650$  nm due to  $[\text{Ru}^{\text{III}}(5\text{-NO}_2\text{-phen})_3]^{3+}$  ( $\epsilon = 1.3 \times 10^3 \text{ M}^{-1} \text{ cm}^{-1}$ ) and the  $\epsilon$  value of  $[\text{Ru}^{\text{III}}(5\text{-NO}_2\text{-phen})_3]^{3+}$  was determined by the electron-transfer oxidation of  $[\text{Ru}^{\text{II}}(5\text{-NO}_2\text{-phen})_3]^{2+}$  with cerium (IV) ammonium nitrate (3 equiv) in the presence of HOTf (30 mM) in  $\text{CF}_3\text{CH}_2\text{OH}-\text{CH}_3\text{CN}$  ( $v/v = 1:1$ ) at 273 K.

**Product analysis.** Products formed in the oxidation of thioanisole by **3** were analyzed by HPLC. Quantitative analysis was performed by comparing the HPLC peak integration of products with its authentic sample. Methyl phenyl sulfoxide was produced as a sole product with 91(4)% yield (based on the concentration of catalyst). In the oxidation of 1,4-cyclohexadiene by **3**, GC and GC-MS were used to analyze products. Benzene was obtained as the sole product with the yield of 48(4)%, as observed in the oxidation of CHD by other metal-oxo complexes including  $[(\text{N4Py})\text{Mn}^{\text{IV}}(\text{O})]^{2+}$ , and  $[(\text{N4Py})\text{Mn}^{\text{IV}}(\text{O})]^{2+}-(\text{Sc}^{3+})_2$ .<sup>S6</sup>

## References

- S1. W. L. F. Armarego and C. L. L. Chai, *Purification of Laboratory Chemicals*, 6th ed.; Pergamon Press: Oxford, 2009.
- S2. J. Kaizer, E. J. Klinker, N. Y. Oh, J.-U. Rohde, W. J. Song, A. Stubna, J. Kim, E. Münck, W. Nam and L. Que, Jr, *J. Am. Chem. Soc.*, 2004, **126**, 472.
- S3. H. Saltzman and J. G. Sharefkin, Eds.; *Organic Syntheses*; Wiley: New York, 1973, Vol. V, p 658.

- S4. N. E. Dixon, G. A. Lawrance, P. A. Lay, A. M. Sargeson and H. Taube, *Inorg. Synth.*, 1990, **28**, 70.
- S5. (a) M. Lubben, A. Meetsma, E. C. Wilkinson, B. Feringa and L. Que, Jr, *Angew. Chem., Int. Ed.*, 1995, **34**, 1512; (b) L. Duelund, R. Hazell, C. J. McKenzie, L. P. Nielsen and H. Toftlund, *J. Chem. Soc., Dalton Trans.*, 2001, 152; (c) S. Groni, P. Dorlet, G. Blain, S. Bourcier, R. Guillot and E. Anxolabéhère-Mallart, *Inorg. Chem.*, 2008, **47**, 3166.
- S6. J. Chen, Y.-M. Lee, K. M. Davis, X. Wu, M. S. Seo, K.-B. Cho, H. Yoon, Y. J. Park, S. Fukuzumi, Y. N. Pushkar and W. Nam, *J. Am. Chem. Soc.*, 2013, **135**, 6388.
- S7. H. Yoon, Y.-M. Lee, X. Wu, K.-B. Cho, R. Sarangi, W. Nam and S. Fukuzumi, *J. Am. Chem. Soc.*, 2013, **135**, 9186.
- S8. (a) X. Wu, M. S. Seo, K. M. Davis, Y.-M. Lee, J. Chen, K.-B. Cho, Y. N. Pushkar and W. Nam, *J. Am. Chem. Soc.*, 2011, **133**, 20088; (b) H. Yoon, Y. Morimoto, Y.-M. Lee, W. Nam and S. Fukuzumi, *Chem. Commun.*, 2012, **48**, 11187.
- S9. (a) O. Fussa-Rydel, H.-T. Zhang, J. T. Hupp and C. R. Leidner, *Inorg. Chem.*, 1989, **28**, 1533; (b) S. Fukuzumi, I. Nakanishi, K. Tanaka, T. Suenobu, A. Tabard, R. Guilard, E. Van Caemelbecke and K. M. Kadish, *J. Am. Chem. Soc.*, 1999, **121**, 785; (c) C.-T. Lin, W. Bottcher, M. Chou, C. Creutz and N. Sutin, *J. Am. Chem. Soc.*, 1976, **98**, 6536.
- S10. A. Tenderholt, B. Hedman and K. O. Hodgson, *PySpline: A Modern, Cross-Platform Program for the Processing of Raw Averaged XAS Edge and EXAFS Data; X-ray Absorption Fine Structure - XAFS13*, 2007, **882**, 105.
- S11. S. I. Zabinsky, J. J. Rehr, A. Ankudinov, R. C. Albers and M. J. Eller, *Phys. Rev. B: Condens. Matter*, 1995, **52**, 2995.
- S12. J. Mustre de Leon, J. J. Rehr, S. I. Zabinsky and R. C. Albers, *Phys. Rev. B: Condens. Matter*, 1991, **44**, 4146.
- S13. J. J. Rehr, J. Mustre de Leon, S. I. Zabinsky and R. C. Albers, *J. Am. Chem. Soc.*, 1991, **113**, 5135.
- S14. *Avogadro: an open-source molecular builder and visualization tool*. Version 1.1.0. <http://avogadro.openmolecules.net/>.
- S15. G. N. George, *EXAFSPAK and EDG-FIT*, Stanford Synchrotron Radiation Laboratory, Stanford Linear Accelerator Center, Stanford, CA, 2000.

**Table S1** EXAFS least squares fitting results for **3**

| complex  | coordination/path | R(Å) <sup>a</sup> | σ <sup>2</sup> (Å <sup>2</sup> ) <sup>b</sup> | E <sub>0</sub> (eV) | F <sup>c</sup> |
|----------|-------------------|-------------------|-----------------------------------------------|---------------------|----------------|
|          | 1 Mn-O            | 1.74              | 331                                           |                     |                |
|          | 5 Mn-N            | 2.00              | 747                                           |                     |                |
|          | 6 Mn-C            | 2.96              | 1326                                          |                     |                |
| <b>3</b> | 8 Mn-C-N          | 3.16              | 264                                           | -3.53               | 0.26           |
|          | 8 Mn-C-N          | 3.33              | /264 <sup>d</sup>                             |                     |                |
|          | 8 Mn-C            | 4.25              | 914                                           |                     |                |
|          | 6 Mn-C-N          | 4.71              | 233                                           |                     |                |

<sup>a</sup>The estimated standard deviations for the distances are in the order of  $\pm 0.02$  Å. <sup>b</sup>The  $\sigma^2$  values are multiplied by  $10^5$ . <sup>c</sup>Error is given by  $\Sigma[(\chi_{\text{obsd}} - \chi_{\text{calcd}})^2 k^6] / \Sigma[(\chi_{\text{obsd}})^2 k^6]$ . <sup>d</sup>/ indicates the  $\sigma^2$  value for the path is linked to the preceding path. The S<sub>0</sub><sup>2</sup> factor was set at 0.95.

**Table S2** Mn-O and Mn-N distances (Å) determined by EXAFS measurements

| coordination/path                | 1                                       | (N4Py)Mn <sup>IV</sup> (O)-(Sc <sup>3+</sup> ) <sub>2</sub> | 3    |
|----------------------------------|-----------------------------------------|-------------------------------------------------------------|------|
| Mn-O                             | 1.70 <sup>a</sup> (1.67) <sup>b,c</sup> | 1.74 <sup>a</sup> (1.74) <sup>a,b</sup>                     | 1.74 |
| Mn-N <sub>avg</sub> <sup>d</sup> | 2.00 <sup>a</sup> (2.01) <sup>b,c</sup> | 2.00 <sup>a</sup> (2.01) <sup>a,b</sup>                     | 2.00 |

<sup>a</sup>Taken from ref. 23 in Text. <sup>b</sup>The values in parenthesis were determined by DFT calculation. <sup>c</sup>Taken from reference, K.-B. Cho, S. Shaik and W. Nam, *J. Phys. Chem. Lett.*, 2012, **3**, 2851. <sup>d</sup>Average value of Mn-N distances.



**Table S3** One-electron reduction potentials ( $E_{\text{red}}$ ) of **3** (0.50 mM) in the presence of various concentrations of HOTf in CF<sub>3</sub>CH<sub>2</sub>OH-CH<sub>3</sub>CN ( $v/v = 1:1$ ) at 273 K

| [HOTf], mM | $E_{\text{red}}$ vs. SCE, V |
|------------|-----------------------------|
| 10         | 1.50                        |
| 20         | 1.61                        |
| 30         | 1.65                        |
| 50         | 1.65                        |
| 80         | 1.65                        |

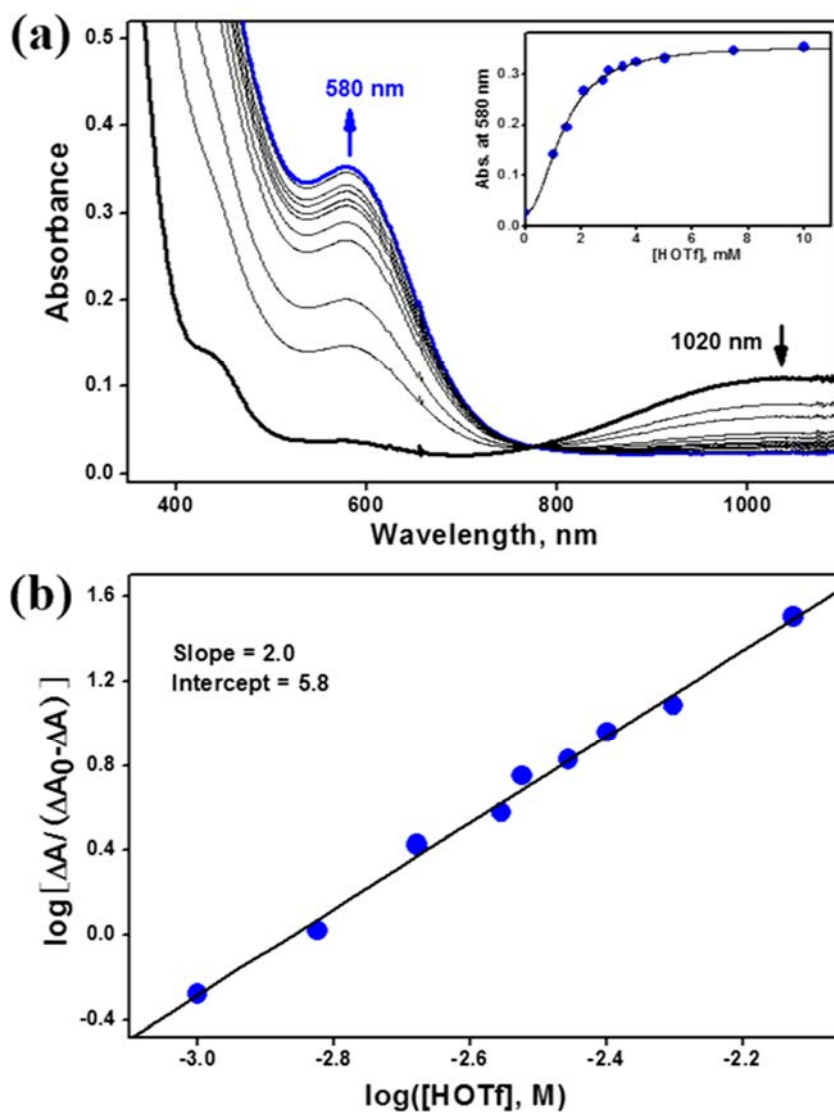

**Fig. S1** (a) UV-vis spectral changes observed in the titration of **2** (black bold line) with  $\text{H}^+$  upon addition of HOTf (0 – 10 mM) into the solution of **2** (0.50 mM) in  $\text{CF}_3\text{CH}_2\text{OH}-\text{CH}_3\text{CN}$  ( $v/v = 1:1$ ) at 273 K. Inset shows the spectral titration monitored at 580 nm (blue circles) due to the formation of **4**. (b) Plot of  $\log(\Delta A/(\Delta A_0 - \Delta A))$  against  $\log[\text{HOTf}]$  in the spectral titration of **2** with HOTf.  $\Delta A$  and  $\Delta A_0$  are the absorption change and final absorption change due to binding of  $n$  molecules of HOTf to **2** (see eqn (1) and (2) in Text).

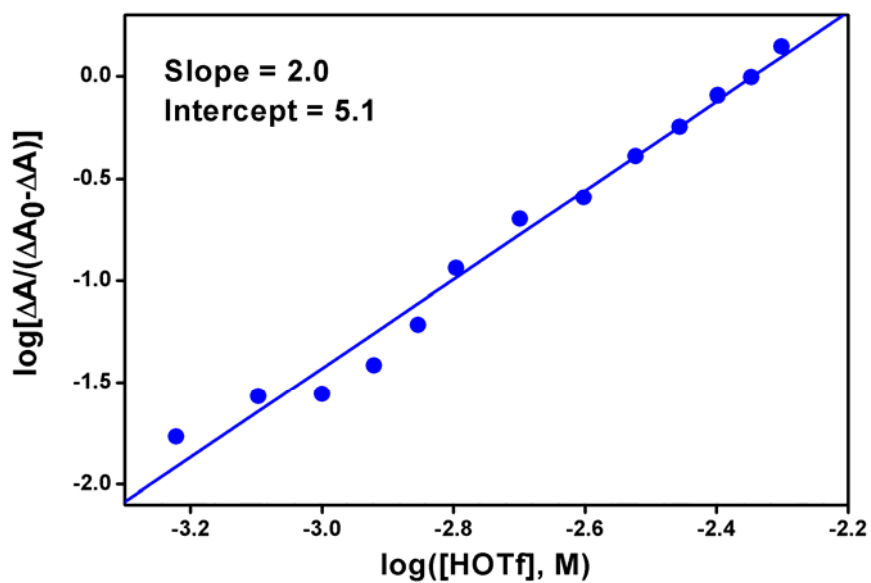

**Fig. S2** Plot of  $\log(\Delta A / (\Delta A_0 - \Delta A))$  against  $\log[\text{HOTf}]$  in the spectral titration of **1** with HOTf.  $\Delta A$  and  $\Delta A_0$  are the absorption change and the final absorption change, respectively, due to binding of  $n$  molecules of HOTf to **1** (see eqn (1) and (2); see also Fig. 2 in Text).

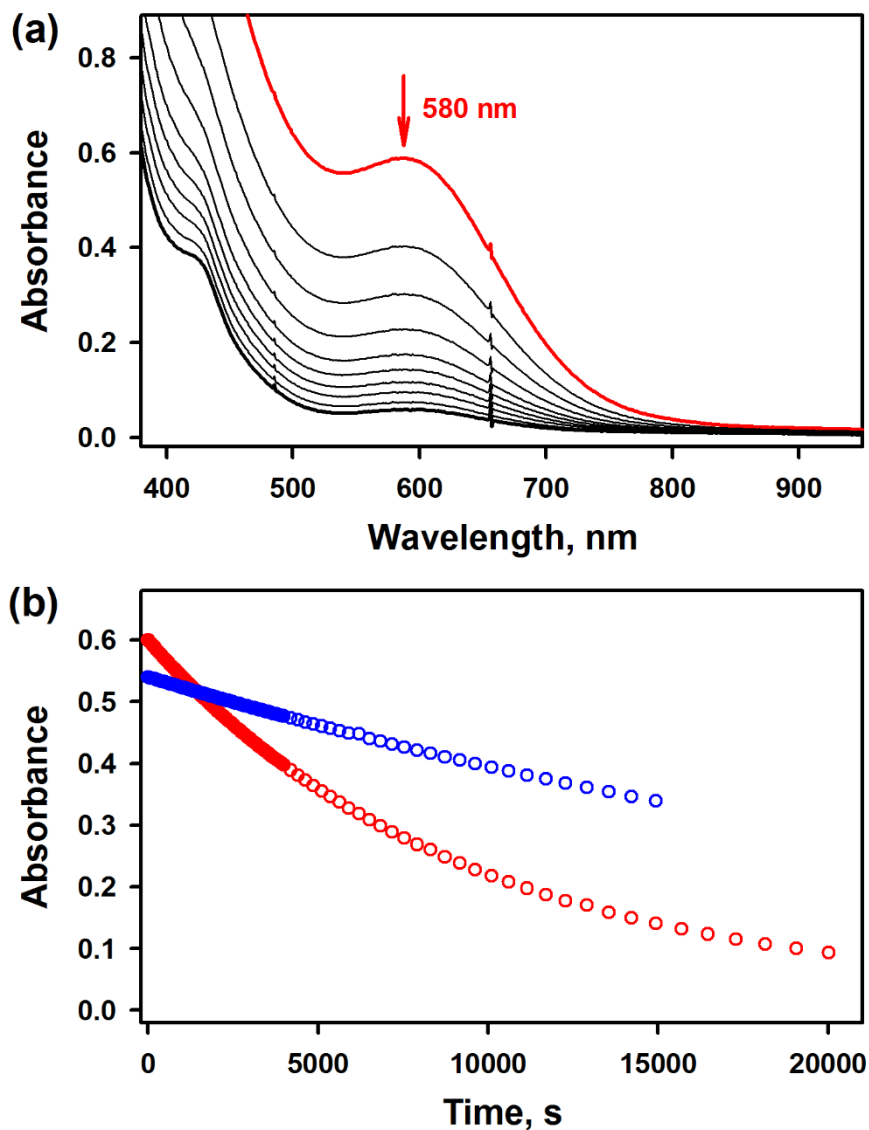

**Fig. S3** (a) UV-vis spectral changes showing the natural decay of **4** (1.0 mM) in  $\text{CF}_3\text{CH}_2\text{OH}-\text{CH}_3\text{CN}$  ( $v/v = 1:1$ ) at 273 K. (b) Time courses of the natural decays of **3** (1.0 mM; blue circles) and **4** (1.0 mM; red circles) monitored at 550 and 580 nm, respectively, in  $\text{CF}_3\text{CH}_2\text{OH}-\text{CH}_3\text{CN}$  ( $v/v = 1:1$ ) at 273 K. The natural decay rates of **3** and **4** were  $3.2 \times 10^{-5} \text{ s}^{-1}$  and  $1.1 \times 10^{-4} \text{ s}^{-1}$ , respectively, at 273 K.

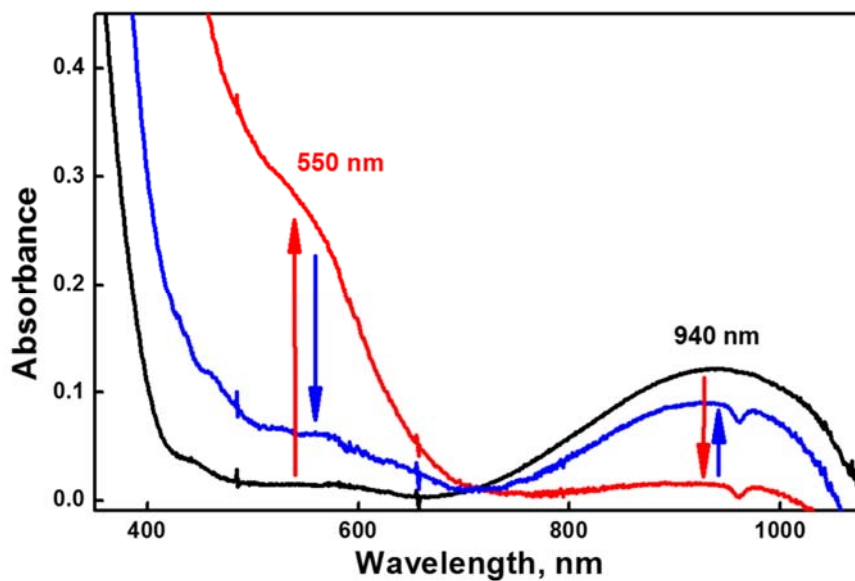

**Fig. S4** UV-Vis spectra of **1** (0.50 mM; black line) and **3** (0.50 mM; red line) in  $\text{CF}_3\text{CH}_2\text{OH}-\text{CH}_3\text{CN}$  ( $v/v = 1:1$ ) at 273 K. **3** was generated by adding 30 mM of HOTf to a solution of **1**. Blue line shows UV-vis spectrum of the reaction solution of **3** (0.50 mM) with triethylamine (30 mM) in  $\text{CF}_3\text{CH}_2\text{OH}-\text{CH}_3\text{CN}$  ( $v/v = 1:1$ ) at 273 K.

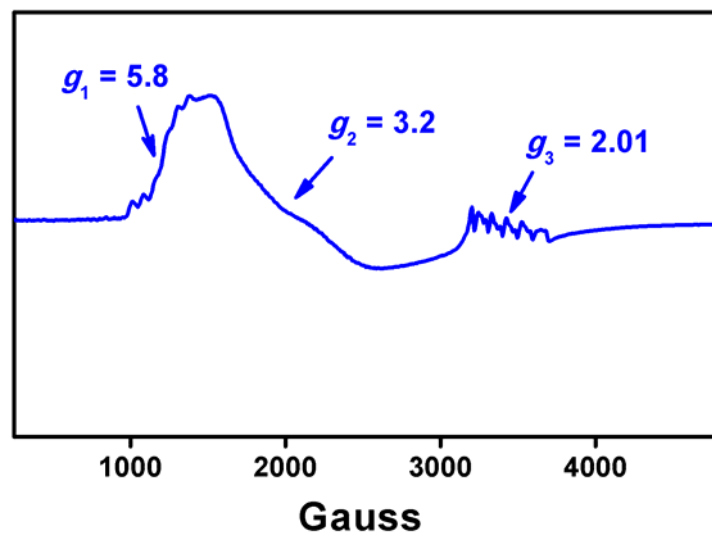

**Fig. S5** X-band CW-EPR spectrum of  $[(N4Py)Mn^{IV}(O)]^{2+}-(HOTf)_2$  (**3**) (2.0 mM) in the presence of HOTf (30 mM) in  $CF_3CH_2OH-CH_3CN$  ( $v/v = 1:1$ ) in perpendicular mode at 5 K. The signals of  $g_1 = 5.8$ ,  $g_2 = 3.2$  and  $g_3 = 2.01$  are characteristic of  $S = 3/2$   $Mn^{IV}$ .

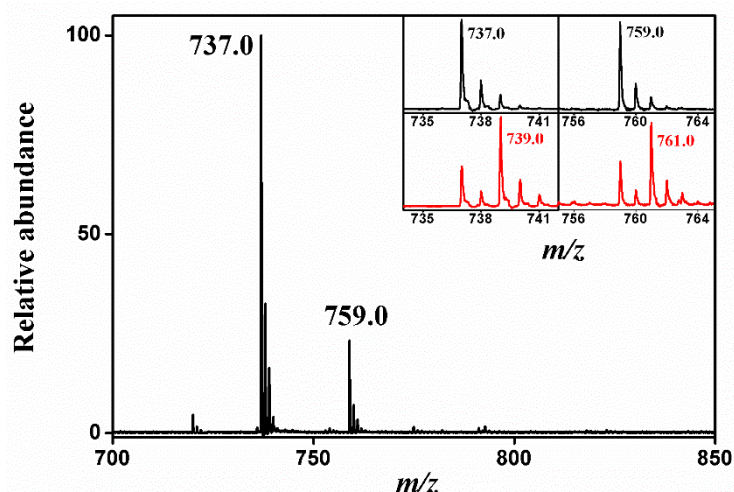

**Fig. S6** CSI-TOF MS spectrum of **3** with HOTf (30 mM) in CF<sub>3</sub>CH<sub>2</sub>OH-CH<sub>3</sub>CN (v/v = 1:1) at 273 K. The mass and isotope distribution patterns of ion peaks at  $m/z = 737.0$  and 759.0 correspond to [Mn<sup>IV</sup>(O)(N4Py)(CF<sub>3</sub>SO<sub>3</sub>)(CF<sub>3</sub>SO<sub>3</sub>H)]<sup>+</sup> (*calcd. m/z* = 737.1) and [Mn<sup>IV</sup>(O)(N4Py)(CF<sub>3</sub>SO<sub>3</sub>)(NaCF<sub>3</sub>SO<sub>3</sub>)]<sup>+</sup> (*calcd. m/z* = 759.0), respectively. Insets show the observed isotope distribution patterns for **3**-<sup>16</sup>O (upper panel) and **3**-<sup>18</sup>O (lower panel). **1**-<sup>16</sup>O (1.0 mM) and **1**-<sup>18</sup>O (1.0 mM) were prepared by reacting [(N4Py)Mn(CF<sub>3</sub>SO<sub>3</sub>)]<sup>+</sup> (1.0 mM) with PhI<sup>16</sup>O (4.0 mM) and PhI<sup>18</sup>O (4.0 mM), respectively, and then **3**-<sup>16</sup>O and **3**-<sup>18</sup>O were generated upon addition of HOTf (30 mM) into the solution of **1**-<sup>16</sup>O (1.0 mM) and **1**-<sup>18</sup>O (1.0 mM). The peak at 759.0 is assigned to [**1**-NaCF<sub>3</sub>SO<sub>3</sub>]<sup>+</sup>, in which the Na<sup>+</sup> ion might be from the CSI-TOF MS conditions.

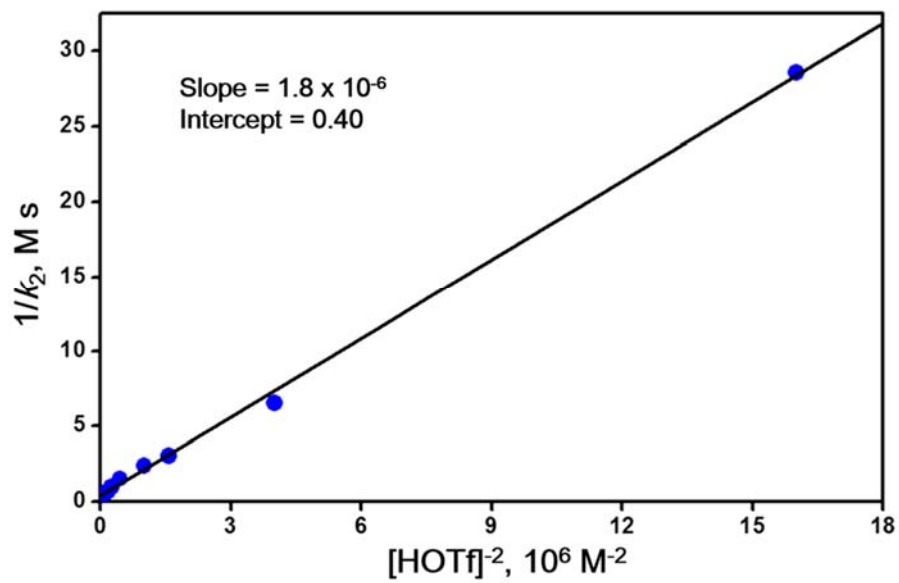

**Fig. S7** Plot of  $1/k_2$  (M s) for sulfoxidation of *para*-CN-thioanisole by **3** (0.50 mM) vs.  $[\text{HOTf}]^{-2}$ .



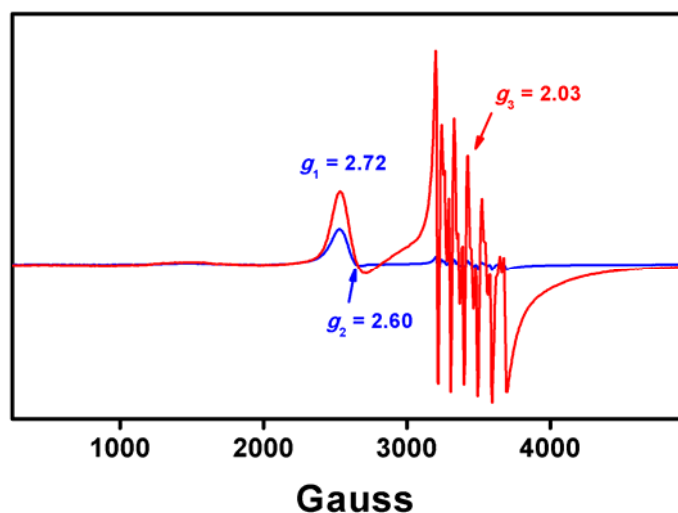

**Fig. S8** X-band CW-EPR spectra of the resulting solutions obtained in the reactions of **3** (2.0 mM) with  $[\text{Ru}^{\text{II}}(5\text{-NO}_2\text{-phen})_3]^{2+}$  [2.0 mM (blue line) and 20 mM (red line)] after 4 h in the presence of HOTf (30 mM) in  $\text{CF}_3\text{CH}_2\text{OH-CH}_3\text{CN}$  ( $v/v = 1:1$ ) at 273 K. EPR spectra were recorded in perpendicular mode at 5 K. The EPR parameters of  $g_1 = 2.72$  and  $g_2 = 2.60$  in blue line are the signals of  $[\text{Ru}^{\text{III}}(5\text{-NO}_2\text{-phen})_3]^{3+}$ ; however, no signals of  $\text{Mn}^{\text{II}}$  species were detected, indicating  $\text{Mn}^{\text{III}}$  species was formed as a product.

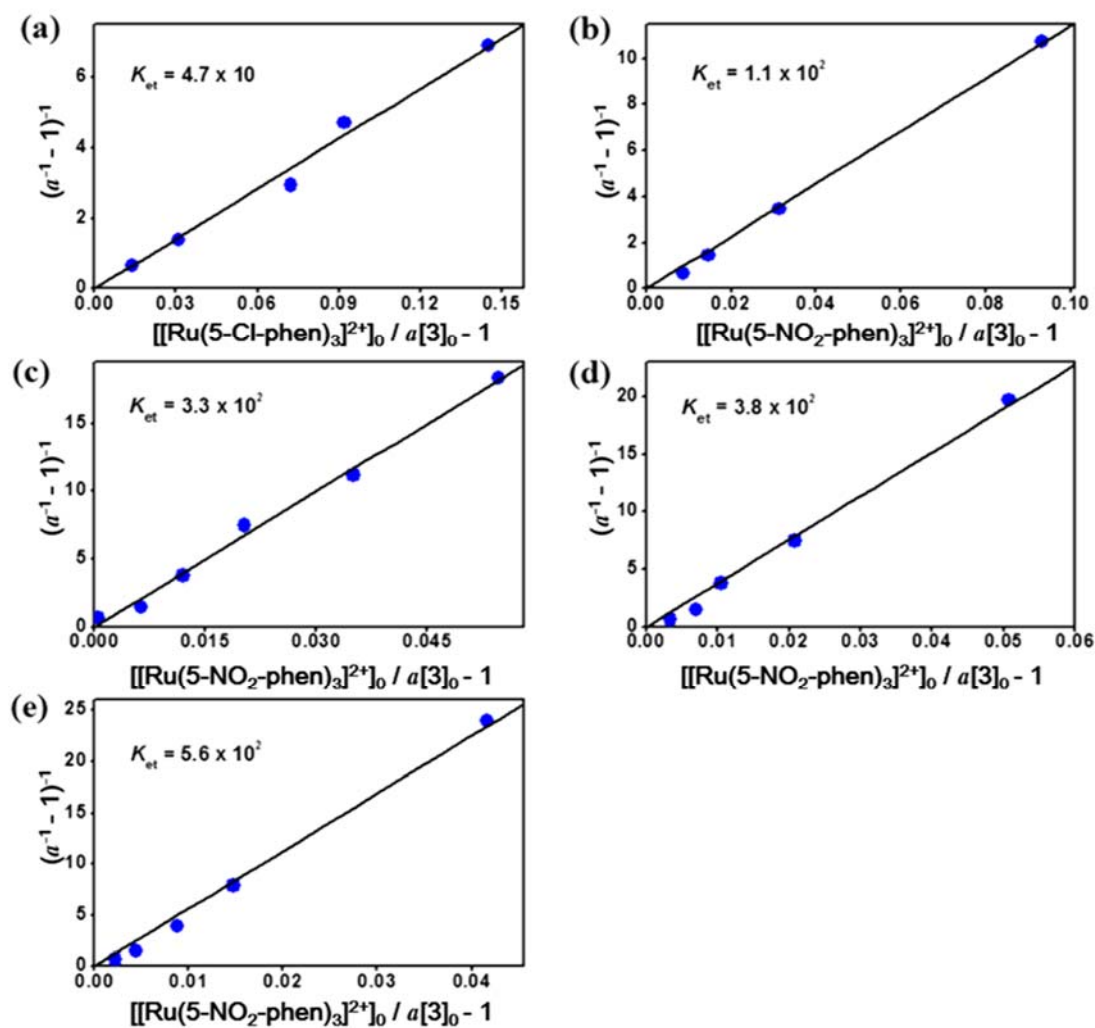

**Fig. S9** (a) Plot of  $(\alpha^{-1} - 1)^{-1}$  vs.  $[[\text{Ru}^{\text{II}}(5\text{-Cl-phen})_3]^{2+}]_0 / a[\mathbf{3}]_0 - 1$  to determine the equilibrium constant,  $K_{et}$  ( $K_{et} = [[\text{Ru}^{\text{III}}]^{3+}][[\text{Mn}^{\text{III}}(\text{O})]^+] / [[\text{Ru}^{\text{II}}]^{2+}][[\text{Mn}^{\text{IV}}(\text{O})]^{2+}]$ ), for electron transfer from  $[\text{Ru}^{\text{II}}(5\text{-Cl-phen})_3]^{2+}$  to **3** upon addition of  $[\text{Ru}^{\text{II}}(5\text{-Cl-phen})_3]^{2+}$  (0 – 1.0 mM) into a solution of **3** (0.50 mM) in the presence of HOTf (10 mM) in  $\text{CF}_3\text{CH}_2\text{OH-CH}_3\text{CN}$  ( $v/v = 1:1$ ) at 273 K ( $\alpha = [[\text{Ru}^{\text{III}}]^{3+}] / [\mathbf{3}]_0$ ). (b, c, d, e) Plots of  $(\alpha^{-1} - 1)^{-1}$  vs.  $[[\text{Ru}^{\text{II}}(5\text{-NO}_2\text{-phen})_3]^{2+}]_0 / a[\mathbf{3}]_0 - 1$  to determine the equilibrium constants for electron transfer from  $[\text{Ru}^{\text{II}}(5\text{-NO}_2\text{-phen})_3]^{2+}$  to **3** upon addition of  $[\text{Ru}^{\text{II}}(5\text{-NO}_2\text{-phen})_3]^{2+}$  (0 – 1.0 mM) into a solution of **3** (0.50 mM) in the presence of HOTf [(b) 20 mM, (c) 30 mM, (d) 50 mM and (e) 80 mM] in  $\text{CF}_3\text{CH}_2\text{OH-CH}_3\text{CN}$  ( $v/v = 1:1$ ) at 273 K ( $\alpha = [[\text{Ru}^{\text{III}}]^{3+}] / [\mathbf{3}]_0$ ).

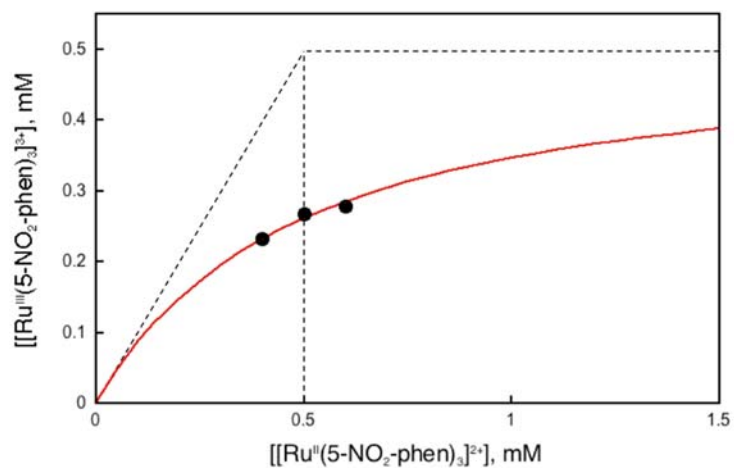

**Fig. S10** Plot of concentration of  $[\text{Ru}^{\text{III}}(5\text{-NO}_2\text{-phen})_3]^{3+}$  produced in electron transfer from  $[\text{Ru}^{\text{II}}(5\text{-NO}_2\text{-phen})_3]^{2+}$  (1.50 V vs. SCE) to  $[(\text{Bn-TPEN})\text{Mn}^{\text{IV}}(\text{O})]^{2+}$  (0.50 mM) in the presence of HOTf (30 mM) in  $\text{CF}_3\text{CH}_2\text{OH-CH}_3\text{CN}$  ( $v/v = 1:1$ ) at 273 K. The equilibrium constant ( $K_{\text{et}}$ ) is determined to be 1.2.

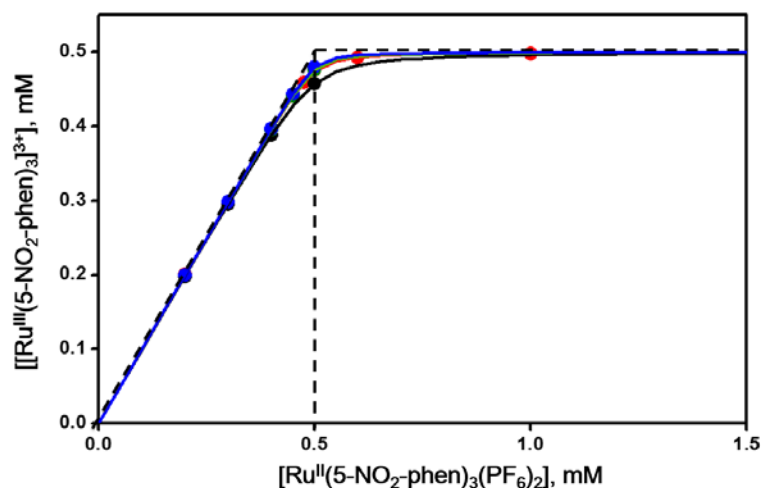

**Fig. S11** Plots of concentration of  $[\text{Ru}^{\text{III}}(5\text{-NO}_2\text{-phen})_3]^{3+}$  produced in electron transfer from  $[\text{Ru}^{\text{II}}(5\text{-NO}_2\text{-phen})_3]^{2+}$  (1.50 V vs. SCE) to  $[(\text{N4Py})\text{Mn}^{\text{IV}}(\text{O})]^{2+}$  (0.50 mM) in the presence of various HOTf concentrations (black circles, 20 mM; red circles, 30 mM; green circles, 50 mM; blue circles, 80 mM) vs. initial concentrations of  $[\text{Ru}^{\text{II}}(5\text{-NO}_2\text{-phen})_3]^{2+}$  in  $\text{CF}_3\text{CH}_2\text{OH}-\text{CH}_3\text{CN}$  ( $v/v = 1:1$ ) at 273 K.

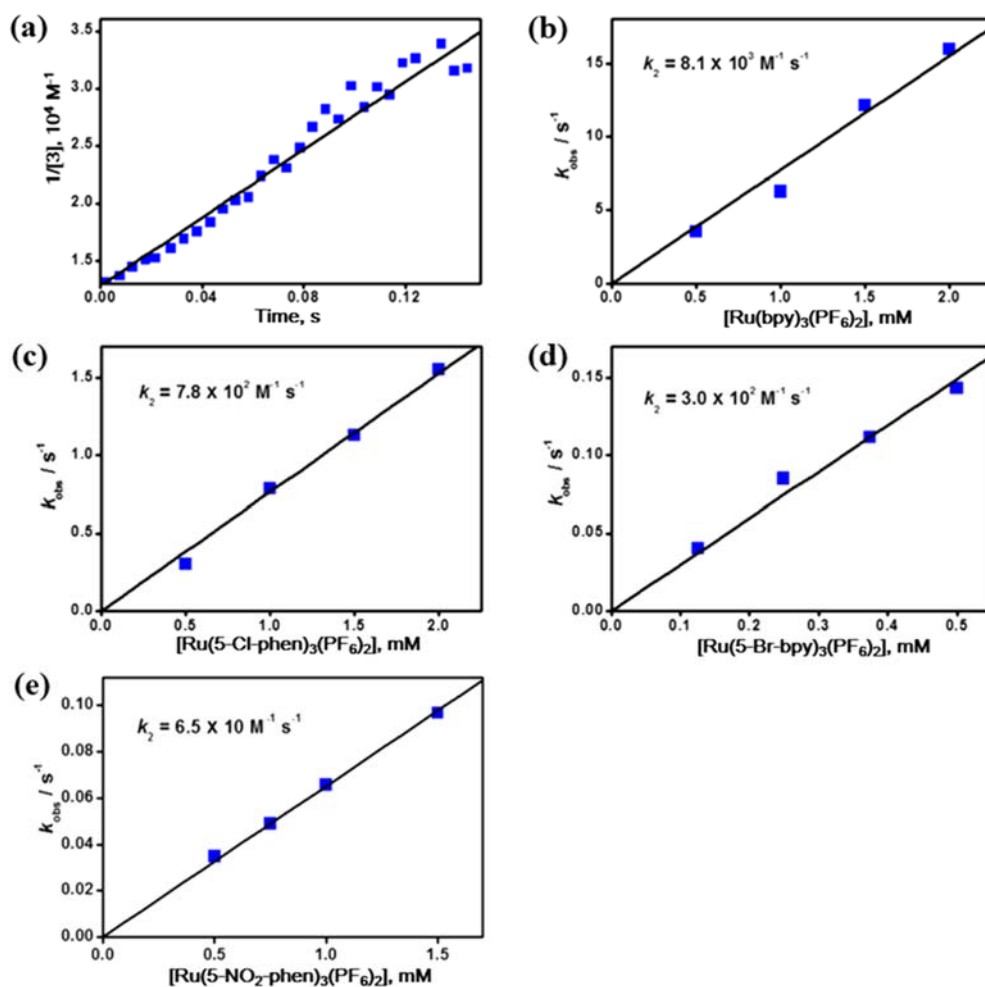

**Fig. S12** (a) Second-order plot of  $1/[3]$  vs. time for electron transfer from  $[\text{Ru}^{\text{II}}(\text{Me}_2\text{-bpy})_3]^{2+}$  (0.10 mM) to **3** (0.10 mM). (b, c, d, e) Plots of  $k_{\text{obs}}$  against the concentration of one-electron reductants to determine second-order rate constants in the electron transfer reactions from one electron reductants [(b)  $[\text{Ru}^{\text{II}}(\text{bpy})_3]^{2+}$ , (c)  $[\text{Ru}^{\text{II}}(5\text{-Cl-phen})_3]^{2+}$ , (d)  $[\text{Ru}^{\text{II}}(5\text{-Br-bpy})_3]^{2+}$  and (e)  $[\text{Ru}^{\text{II}}(5\text{-NO}_2\text{-phen})_3]^{2+}$ ] to **3** in the presence of HOTf (30 mM) in  $\text{CF}_3\text{CH}_2\text{OH}-\text{CH}_3\text{CN}$  ( $v/v = 1:1$ ) at 273 K.

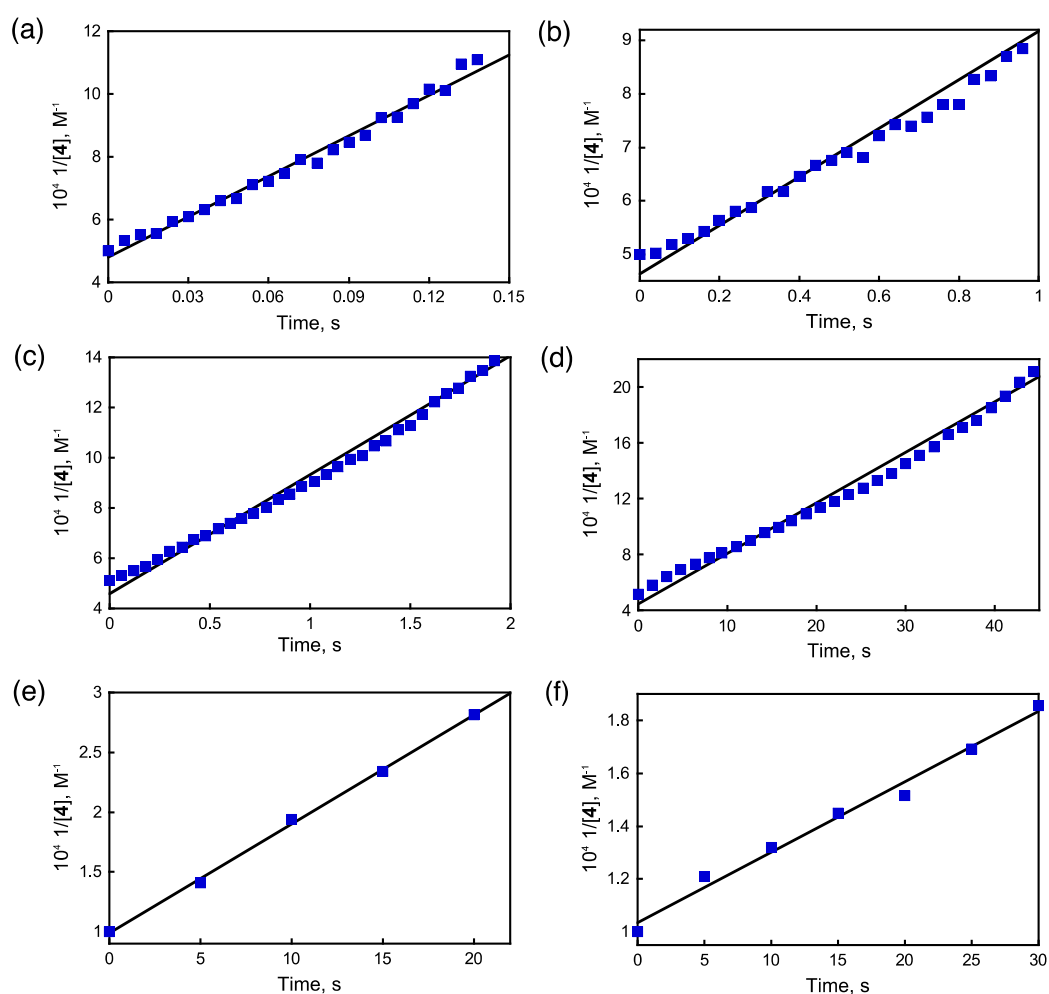

**Fig. S13** Second-order plots of  $1/[4]$  vs. time for electron transfer from one electron reductants (0.020 mM; (a)  $[\text{Fe}^{\text{II}}(\text{Me}_2\text{-bpy})_3]^{2+}$ , (b)  $[\text{Fe}^{\text{II}}(\text{phen})_3]^{2+}$ , (c)  $[\text{Fe}^{\text{II}}(\text{bpy})_3]^{2+}$ , (d)  $[[\text{Ru}^{\text{II}}(\text{Me}_2\text{-bpy})_3]^{2+}]$ , (e)  $[\text{Ru}^{\text{II}}(5\text{-Br-bpy})_3]^{2+}$  and (f)  $[\text{Ru}^{\text{II}}(5\text{-Cl-phen})_3]^{2+}$ ) to **4** (0.020 mM) in the presence of HOTf (30 mM) in  $\text{CF}_3\text{CH}_2\text{OH}-\text{CH}_3\text{CN}$  ( $v/v = 1:1$ ) at 273 K.

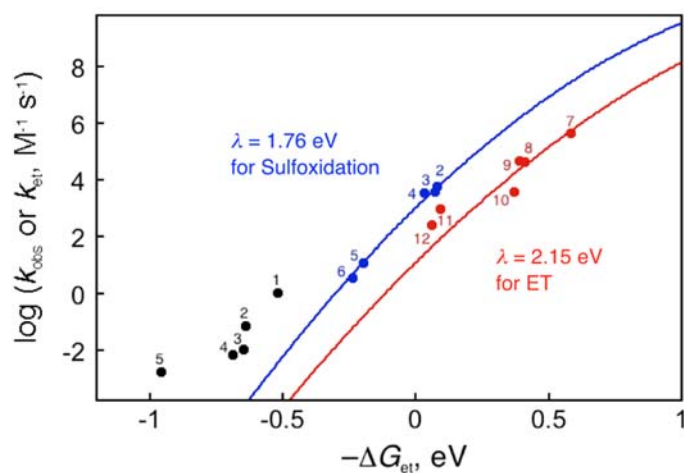

**Fig. S14** Plots of  $\log k_2$  for sulfoxidation of *para*-*X*-substituted thioanisoles [*X* = (1) Me, (2) H, (3) F, (4) Br, (5) CN and (6) NO<sub>2</sub>] by [(Bn-TPEN)Mn<sup>IV</sup>(O)]<sup>2+</sup> (**2**; black circles) and [(Bn-TPEN)Mn<sup>IV</sup>(O)]<sup>2+</sup>-(HOTf)<sub>2</sub> (**4**; blue circles) vs. the driving force of electron transfer [ $-\Delta G_{\text{et}} = e(E_{\text{red}} - E_{\text{ox}})$ ] from thioanisoles to **2** ( $E_{\text{red}} = 0.78$  V vs. SCE) and **4** ( $E_{\text{red}} = 1.50$  V vs. SCE) in the presence of HOTf (30 mM) in CF<sub>3</sub>CH<sub>2</sub>OH-CH<sub>3</sub>CN ( $v/v = 1:1$ ) at 273 K. The red circles show the driving force dependence of the rate constants ( $\log k_2$ ) of ET from one-electron reductants [(7) [Fe<sup>II</sup>(Me<sub>2</sub>-bpy)<sub>3</sub>]<sup>2+</sup>, (8) [Fe<sup>II</sup>(bpy)<sub>3</sub>]<sup>2+</sup>, (9) [Fe<sup>II</sup>(phen)<sub>3</sub>]<sup>2+</sup>, (10) [Ru<sup>II</sup>(Me<sub>2</sub>-bpy)<sub>3</sub>]<sup>2+</sup>, (11) [Ru<sup>II</sup>(5-Cl-phen)<sub>3</sub>]<sup>2+</sup> and (12) [Ru<sup>II</sup>(Br-bpy)<sub>3</sub>]<sup>2+</sup>] to **4** in CF<sub>3</sub>CH<sub>2</sub>OH-CH<sub>3</sub>CN ( $v/v = 1:1$ ) at 273 K. The blue and red lines are the Marcus lines calculated with  $\lambda$  values of 1.76 and 2.15 eV, respectively.

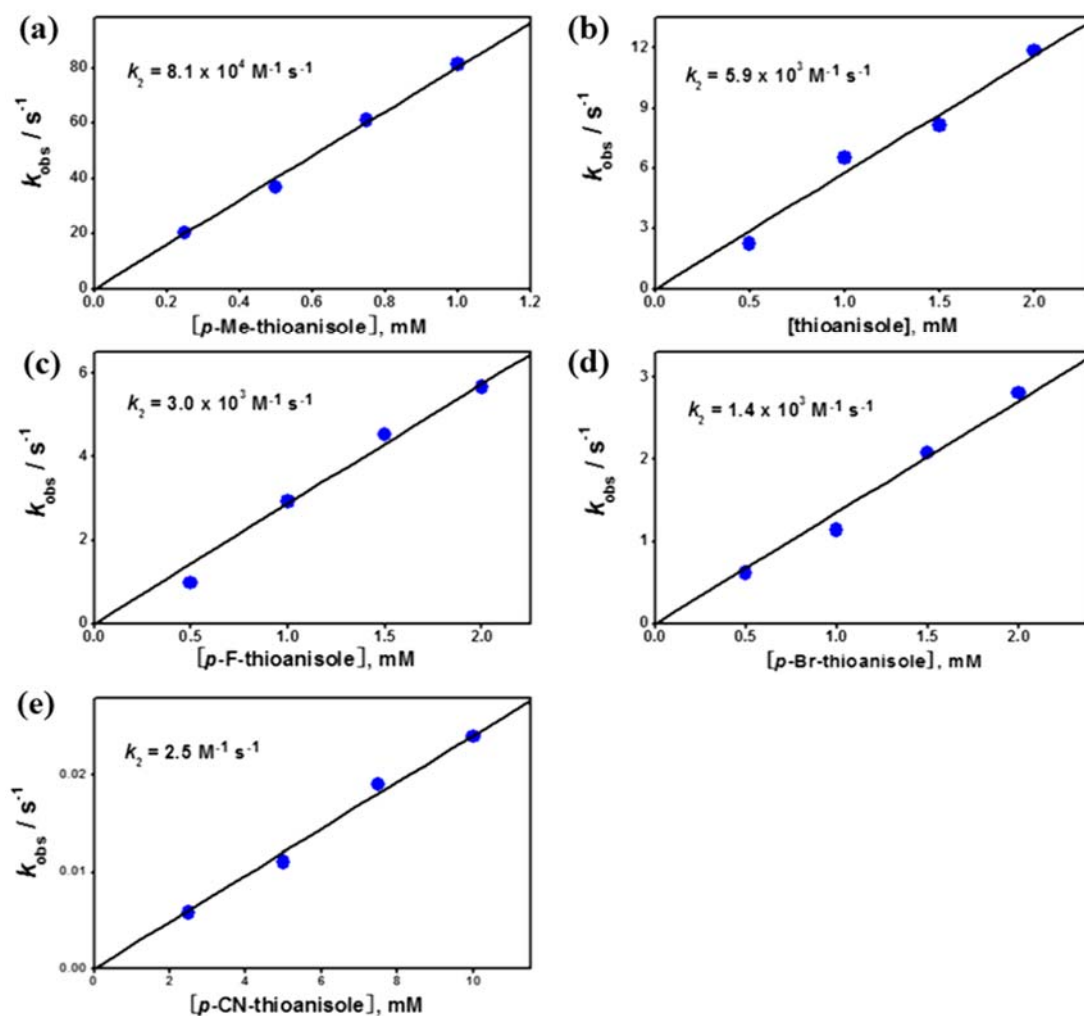

**Fig. S15** Plots of  $k_{\text{obs}}$  against the concentration of *para*-X-thioanisoles to determine second-order rate constants ( $k_2$ ) in the oxidation of *para*-X-thioanisoles [X = (a) Me, (b) H, (c) F, (d) Br and (e) CN] by **3** in the presence of HOTf (30 mM) in  $\text{CF}_3\text{CH}_2\text{OH}-\text{CH}_3\text{CN}$  ( $v/v = 1:1$ ) at 273 K.



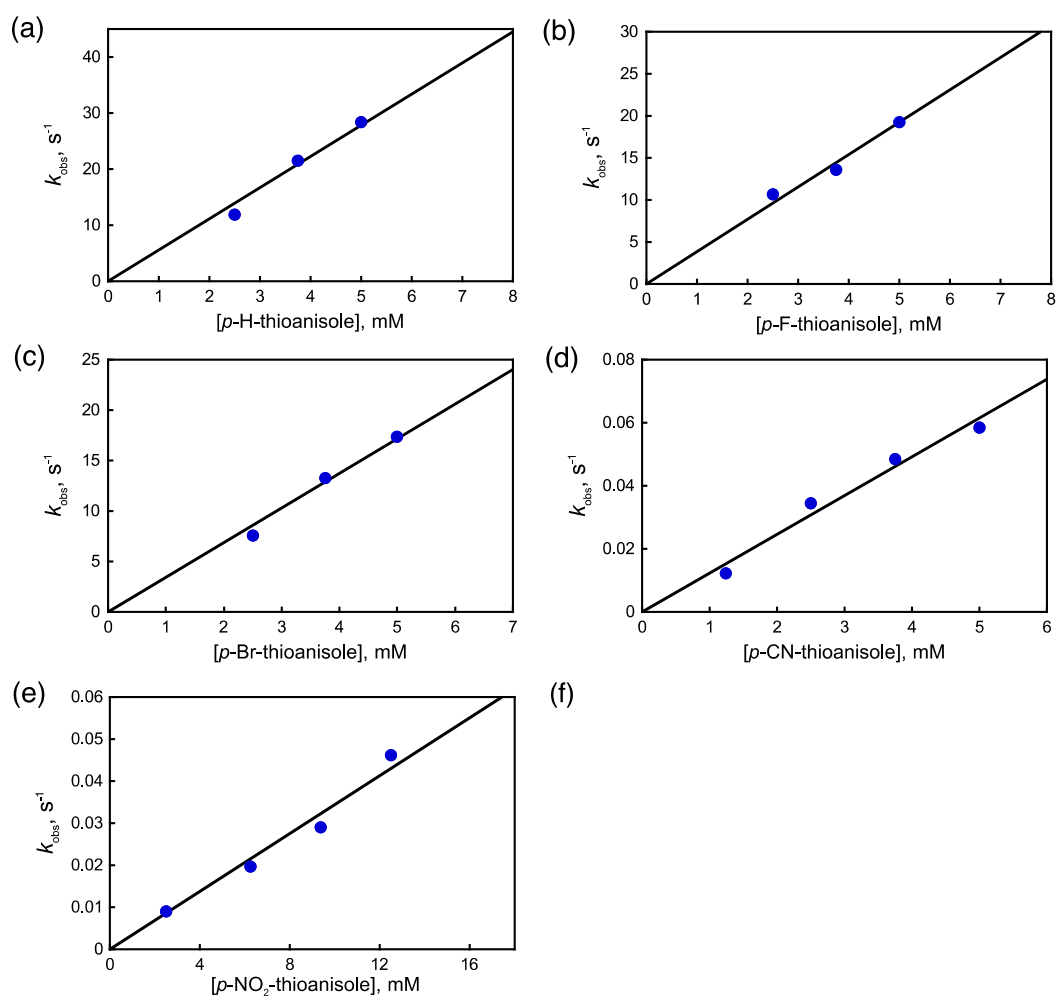

**Fig. S16** (a) Plots of the pseudo-first-order rate constants ( $k_{\text{obs}}$ ) of *para*-X-substituted thioanisoles [X = (a) H, (b) F, (c) Br, (d) CN and (e) NO<sub>2</sub>] at 580 nm due to the decay of [(Bn-TPEN)Mn<sup>IV</sup>(O)]<sup>2+</sup>-(HOTf)<sub>2</sub> in the presence of HOTf (30 mM) in CF<sub>3</sub>CH<sub>2</sub>OH-CH<sub>3</sub>CN ( $v/v = 1:1$ ) at 273 K.

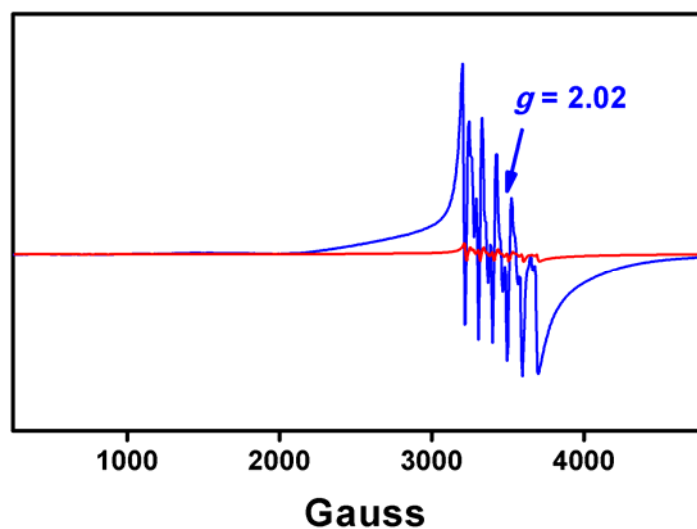

**Fig. S17** X-band EPR spectra of reaction solutions of  $[(\text{N}4\text{Py})\text{Mn}^{\text{IV}}(\text{O})]^{2+}-(\text{HOTf})_2$  (**3**, 2.0 mM) with thioanisole (20 mM; blue line) and 1,4-cyclohexadiene (20 mM; red line) in the presence of HOTf (30 mM) in  $\text{CF}_3\text{CH}_2\text{OH}-\text{CH}_3\text{CN}$  ( $v/v = 1:1$ ) at 273 K and 298 K, respectively. EPR spectra were recorded in perpendicular mode at 5 K.

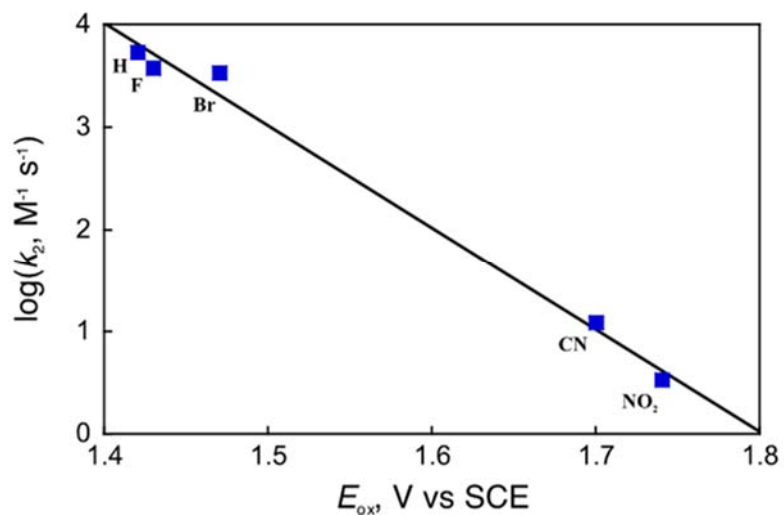

**Fig. S18** Plot of  $\log k_2$  against the one-electron oxidation potentials ( $E_{ox}$ ) of *para*-X-thioanisoles (X = H, F, Br, CN and NO<sub>2</sub>) by [(Bn-TPEN)Mn<sup>IV</sup>(O)]<sup>2+</sup>-(HOTf)<sub>2</sub> [slope = -10.0(6)] in the presence of HOTf (30 mM) in CF<sub>3</sub>CH<sub>2</sub>OH-CH<sub>3</sub>CN (v/v = 1:1) at 273 K.

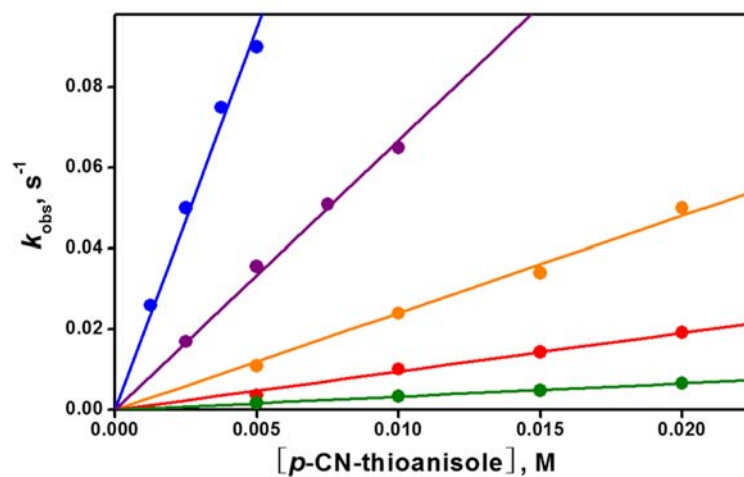

**Fig. S19** Plots of  $k_{\text{obs}}$  against the concentration of *para*-CN-thioanisole to determine second-order rate constants ( $k_2$ ) in the oxidation of *para*-CN-thioanisole by **3** in the presence of HOTf (30 mM) in CF<sub>3</sub>CH<sub>2</sub>OH-CH<sub>3</sub>CN ( $v/v = 1:1$ ) at various temperature [293 K (blue), 283 K (violet), 273 K (orange), 263 K (red) and 253 K (green)].

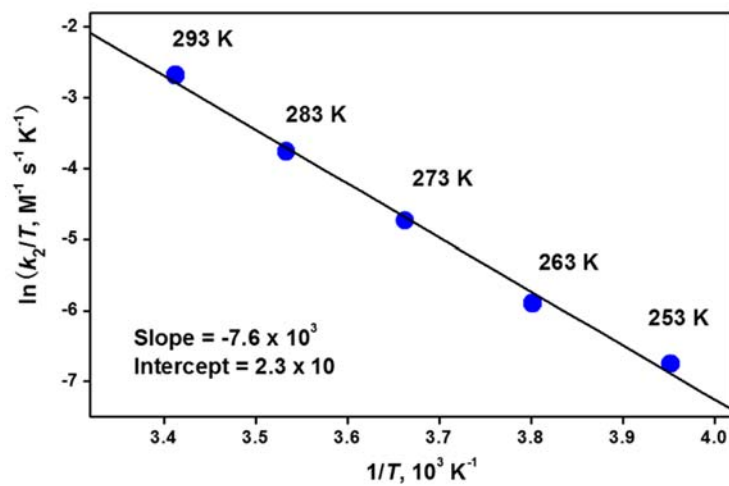

**Fig. S20** Eyring plot to determine activation parameters for the reaction of **3** with *para*-CN-thioanisole in the presence of HOTf (30 mM) in CF<sub>3</sub>CH<sub>2</sub>OH-CH<sub>3</sub>CN (*v/v* = 1:1).

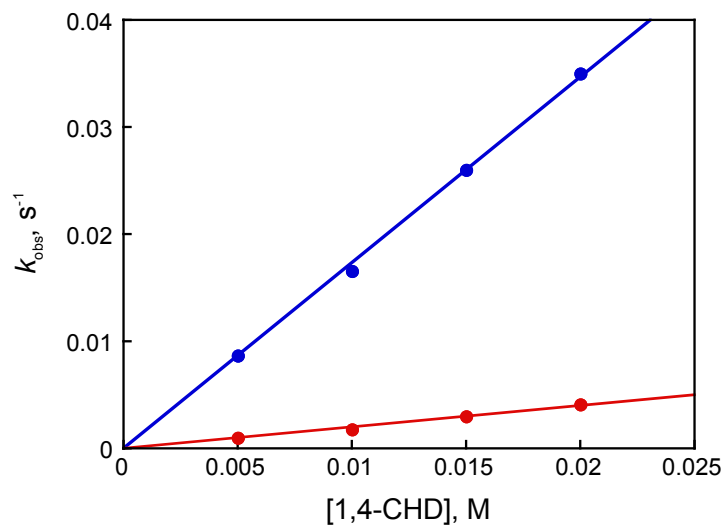

**Fig. S21** Plots of  $k_{\text{obs}}$  against the concentration of 1,4-cyclohexadiene (CHD) to determine the second-order rate constants in the oxidation of CHD by **2** (0.25 mM) and **4** (0.25 mM) in  $\text{CF}_3\text{CH}_2\text{OH}-\text{CH}_3\text{CN}$  ( $v/v = 1:1$ ) at 273 K, respectively. Deceleration ( $\sim 9$ -fold) of C-H bond activation by  $[(\text{Bn-TPEN})\text{Mn}^{\text{IV}}(\text{O})]^{2+}-(\text{HOTf})_2$  can be explained as prohibiting suitable interaction between Mn(IV)-oxo moiety and CHD.
